# Supplementary material for: First principles calculation of the potential energy surface for the lowest-quartet state of H3 and modelling by the double many-body expansion method
Source: Royal Society of Chemistry journal article supplement (doi:10.1039/b000464m), 2000-01-01
Supplement: table_esi.pdf [file table_esi.pdf]

TABLE 1: A compararison of the calculated restricted Hartree-Fock interaction energies for  $H_3(^4A')$ , in  $\mu E_h$ , with the fitted values from Eq. 5.

| Number | shape | $R_1$ | $R_2$ | $R_3$ | calc.     | fit       | error(%) |
|--------|-------|-------|-------|-------|-----------|-----------|----------|
| 1      | 1     | 2.00  | 2.00  | 2.00  | 255870.62 | 255599.03 | 0.11     |
| 2      | 1     | 3.00  | 3.00  | 3.00  | 71578.66  | 70979.18  | 0.84     |
| 3      | 1     | 4.00  | 4.00  | 4.00  | 19137.06  | 19072.88  | 0.34     |
| 4      | 1     | 5.00  | 5.00  | 5.00  | 4637.59   | 4633.15   | 0.10     |
| 5      | 1     | 6.00  | 6.00  | 6.00  | 1015.77   | 1015.65   | 0.01     |
| 6      | 1     | 7.00  | 7.00  | 7.00  | 204.30    | 204.59    | -0.14    |
| 7      | 1     | 8.00  | 8.00  | 8.00  | 38.41     | 38.58     | -0.44    |
| 8      | 2     | 2.25  | 1.88  | 1.88  | 261754.22 | 261774.44 | -0.01    |
| 9      | 2     | 3.38  | 2.81  | 2.81  | 77195.34  | 76967.39  | 0.30     |
| 10     | 2     | 4.50  | 3.75  | 3.75  | 21813.02  | 21806.05  | 0.03     |
| 11     | 2     | 5.63  | 4.69  | 4.69  | 5644.01   | 5642.94   | 0.02     |
| 12     | 2     | 6.75  | 5.63  | 5.63  | 1339.28   | 1339.44   | -0.01    |
| 13     | 2     | 7.88  | 6.56  | 6.56  | 299.74    | 300.07    | -0.11    |
| 14     | 2     | 9.00  | 7.50  | 7.50  | 62.50     | 62.66     | -0.26    |
| 15     | 3     | 2.75  | 1.75  | 1.75  | 276311.33 | 278620.32 | -0.84    |
| 16     | 3     | 3.75  | 2.63  | 2.63  | 92704.85  | 93784.57  | -1.16    |
| 17     | 3     | 5.00  | 3.50  | 3.50  | 29513.21  | 29775.11  | -0.89    |
| 18     | 3     | 6.25  | 4.38  | 4.38  | 8536.71   | 8561.96   | -0.30    |
| 19     | 3     | 7.50  | 5.25  | 5.25  | 2318.59   | 2322.51   | -0.17    |
| 20     | 3     | 8.75  | 6.13  | 6.13  | 580.76    | 581.62    | -0.15    |
| 21     | 3     | 10.00 | 7.00  | 7.00  | 140.22    | 140.43    | -0.15    |
| 22     | 4     | 2.75  | 1.63  | 1.63  | 317956.56 | 320895.49 | -0.92    |
| 23     | 4     | 4.13  | 2.44  | 2.44  | 121622.00 | 124537.20 | -2.40    |
| 24     | 4     | 5.50  | 3.25  | 3.25  | 42780.39  | 43477.86  | -1.63    |
| 25     | 4     | 6.88  | 4.06  | 4.06  | 13818.05  | 13876.89  | -0.43    |
| 26     | 4     | 8.25  | 4.88  | 4.88  | 4111.88   | 4118.98   | -0.17    |
| 27     | 4     | 9.63  | 5.69  | 5.69  | 1173.82   | 1175.16   | -0.11    |
| 28     | 4     | 11.00 | 6.50  | 6.50  | 319.57    | 319.80    | -0.07    |
| 29     | 5     | 3.00  | 1.50  | 1.50  | 373411.99 | 377351.54 | -1.06    |
| 30     | 5     | 4.50  | 2.25  | 2.25  | 171488.10 | 170692.73 | 0.46     |

*continued on next page*

| Number | shape | $R_1$ | $R_2$ | $R_3$ | calc.     | fit       | error(%) |
|--------|-------|-------|-------|-------|-----------|-----------|----------|
| 31     | 5     | 6.00  | 3.00  | 3.00  | 63857.63  | 64314.55  | -0.72    |
| 32     | 5     | 7.50  | 3.75  | 3.75  | 22201.06  | 22123.98  | 0.35     |
| 33     | 5     | 9.00  | 4.50  | 4.50  | 7378.79   | 7350.67   | 0.38     |
| 34     | 5     | 10.50 | 5.25  | 5.25  | 2349.86   | 2344.85   | 0.21     |
| 35     | 5     | 12.00 | 6.00  | 6.00  | 719.05    | 718.21    | 0.12     |
| 36     | 6     | 2.25  | 2.25  | 1.50  | 289072.57 | 289216.77 | -0.05    |
| 37     | 6     | 3.38  | 3.38  | 2.25  | 97503.76  | 97286.03  | 0.22     |
| 38     | 6     | 4.50  | 4.50  | 3.00  | 34110.48  | 33952.50  | 0.46     |
| 39     | 6     | 5.63  | 5.63  | 3.75  | 11582.88  | 11533.81  | 0.42     |
| 40     | 6     | 6.75  | 6.75  | 4.50  | 3792.27   | 3783.65   | 0.23     |
| 41     | 6     | 7.88  | 7.88  | 5.25  | 1194.01   | 1193.06   | 0.08     |
| 42     | 6     | 9.00  | 9.00  | 6.00  | 362.75    | 362.76    | 0.00     |
| 43     | 7     | 2.50  | 2.13  | 1.38  | 313059.70 | 313891.27 | -0.27    |
| 44     | 7     | 3.75  | 3.19  | 2.06  | 118010.29 | 118399.15 | -0.33    |
| 45     | 7     | 5.00  | 4.25  | 2.75  | 45949.85  | 45843.65  | 0.23     |
| 46     | 7     | 6.25  | 5.31  | 3.44  | 17461.82  | 17403.30  | 0.34     |
| 47     | 7     | 7.50  | 6.38  | 4.13  | 6424.73   | 6414.21   | 0.16     |
| 48     | 7     | 8.75  | 7.44  | 4.81  | 2318.91   | 2317.68   | 0.05     |
| 49     | 7     | 10.00 | 8.50  | 5.50  | 796.95    | 796.92    | 0.00     |
| 50     | 8     | 2.75  | 2.00  | 1.25  | 357478.06 | 360188.95 | -0.76    |
| 51     | 8     | 4.13  | 3.00  | 1.88  | 150897.00 | 152357.96 | -0.97    |
| 52     | 8     | 5.50  | 4.00  | 2.50  | 64858.54  | 64912.41  | -0.08    |
| 53     | 8     | 6.88  | 5.00  | 3.13  | 26899.93  | 26838.14  | 0.23     |
| 54     | 8     | 8.25  | 6.00  | 3.75  | 11096.17  | 11085.00  | 0.10     |
| 55     | 8     | 9.63  | 7.00  | 4.38  | 4407.78   | 4406.62   | 0.03     |
| 56     | 8     | 11.00 | 8.00  | 5.00  | 1726.97   | 1726.90   | 0.00     |
| 57     | 9     | 1.88  | 3.00  | 1.13  | 416557.36 | 423482.60 | -1.66    |
| 58     | 9     | 2.81  | 4.50  | 1.69  | 208327.13 | 204504.06 | 1.84     |
| 59     | 9     | 3.75  | 6.00  | 2.25  | 93850.41  | 92919.27  | 0.99     |
| 60     | 9     | 4.69  | 7.50  | 2.81  | 42008.10  | 41719.98  | 0.69     |
| 61     | 9     | 5.63  | 9.00  | 3.78  | 10989.50  | 10970.89  | 0.17     |
| 62     | 9     | 3.94  | 10.50 | 6.56  | 8362.91   | 8355.70   | 0.09     |

*continued on next page*

| Number | shape | $R_1$ | $R_2$ | $R_3$ | calc.      | fit        | error(%) |
|--------|-------|-------|-------|-------|------------|------------|----------|
| 63     | 9     | 7.50  | 12.00 | 4.50  | 3666.21    | 3665.10    | 0.03     |
| 64     | 10    | 2.50  | 2.50  | 1.00  | 436834.96  | 436834.51  | 0.00     |
| 65     | 10    | 3.75  | 3.75  | 1.50  | 202200.39  | 201782.38  | 0.21     |
| 66     | 10    | 5.00  | 5.00  | 2.00  | 108070.49  | 107433.33  | 0.59     |
| 67     | 10    | 6.25  | 6.25  | 2.50  | 57590.17   | 57391.44   | 0.35     |
| 68     | 10    | 7.50  | 7.50  | 3.00  | 29985.97   | 29950.67   | 0.12     |
| 69     | 10    | 8.75  | 8.75  | 3.50  | 15221.43   | 15217.15   | 0.03     |
| 70     | 10    | 10.00 | 10.00 | 4.00  | 7530.20    | 7529.93    | 0.00     |
| 71     | 11    | 2.75  | 2.37  | 0.88  | 518915.37  | 519856.29  | -0.18    |
| 72     | 11    | 4.13  | 3.56  | 1.31  | 257062.28  | 256521.42  | 0.21     |
| 73     | 11    | 5.50  | 4.75  | 1.75  | 147174.74  | 146172.65  | 0.68     |
| 74     | 11    | 6.88  | 5.94  | 2.19  | 85199.76   | 84924.38   | 0.32     |
| 75     | 11    | 8.25  | 7.13  | 2.63  | 48681.14   | 48637.98   | 0.09     |
| 76     | 11    | 9.63  | 8.31  | 3.06  | 27669.87   | 27664.63   | 0.02     |
| 77     | 11    | 11.00 | 9.50  | 3.50  | 15219.15   | 15219.03   | 0.00     |
| 78     | 12    | 3.00  | 2.25  | 0.75  | 650706.19  | 661990.48  | -1.73    |
| 79     | 12    | 4.50  | 3.38  | 1.13  | 340943.81  | 336983.07  | 1.16     |
| 80     | 12    | 6.00  | 4.50  | 1.50  | 206284.79  | 201298.63  | 2.42     |
| 81     | 12    | 7.50  | 5.63  | 1.88  | 125813.33  | 124821.09  | 0.79     |
| 82     | 12    | 9.00  | 6.75  | 2.25  | 78981.76   | 78850.04   | 0.17     |
| 83     | 12    | 10.50 | 7.88  | 2.63  | 48658.16   | 48644.48   | 0.03     |
| 84     | 12    | 12.00 | 9.00  | 3.00  | 29967.03   | 29965.49   | 0.01     |
| 85     | 13    | 2.75  | 2.75  | 0.50  | 1155992.89 | 1136132.64 | 1.72     |
| 86     | 13    | 4.13  | 4.13  | 0.75  | 605043.70  | 605043.70  | 0.00     |
| 87     | 13    | 5.50  | 5.50  | 1.00  | 384475.86  | 384475.44  | 0.00     |
| 88     | 13    | 6.88  | 6.88  | 1.25  | 268961.35  | 268909.01  | 0.02     |
| 89     | 13    | 8.25  | 8.25  | 1.50  | 196329.37  | 196328.11  | 0.00     |
| 90     | 13    | 9.63  | 9.63  | 1.75  | 145123.83  | 145127.81  | 0.00     |
| 91     | 13    | 11.00 | 11.00 | 2.00  | 107182.97  | 107185.69  | 0.00     |
| 92     | 14    | 3.00  | 2.63  | 0.38  | 1696644.79 | 1672989.78 | 1.39     |
| 93     | 14    | 4.50  | 3.94  | 0.56  | 944406.50  | 947766.94  | -0.36    |

*continued on next page*

| Number | shape | $R_1$ | $R_2$ | $R_3$ | calc.     | fit       | error(%) |
|--------|-------|-------|-------|-------|-----------|-----------|----------|
| 94     | 14    | 6.00  | 5.25  | 0.75  | 606453.24 | 607884.37 | -0.24    |
| 95     | 14    | 7.50  | 6.56  | 0.94  | 427627.45 | 425021.53 | 0.61     |
| 96     | 14    | 9.00  | 7.87  | 1.13  | 317535.50 | 317076.63 | 0.14     |
| 97     | 14    | 10.50 | 9.19  | 1.31  | 248878.67 | 248874.07 | 0.00     |
| 98     | 14    | 12.00 | 10.50 | 1.50  | 196330.86 | 196351.41 | -0.01    |
|        | 1     | 9.00  | 9.00  | 9.00  | 6.83      | 6.90      | -1.02    |
|        | 1     | 11.00 | 11.00 | 11.00 | 0.16      | 0.16      | 0.00     |
|        | 1     | 12.00 | 12.00 | 12.00 | 0.01      | 0.01      | 0.00     |
|        |       | 8.54  | 8.54  | 10.00 | 10.51     | 10.64     | -1.24    |
